# Supplementary material
Source: PubMed Central journal article supplement (PMC2794232)
Supplement: ASN.2009070696_1.pdf [file ASN.2009070696_1.pdf]

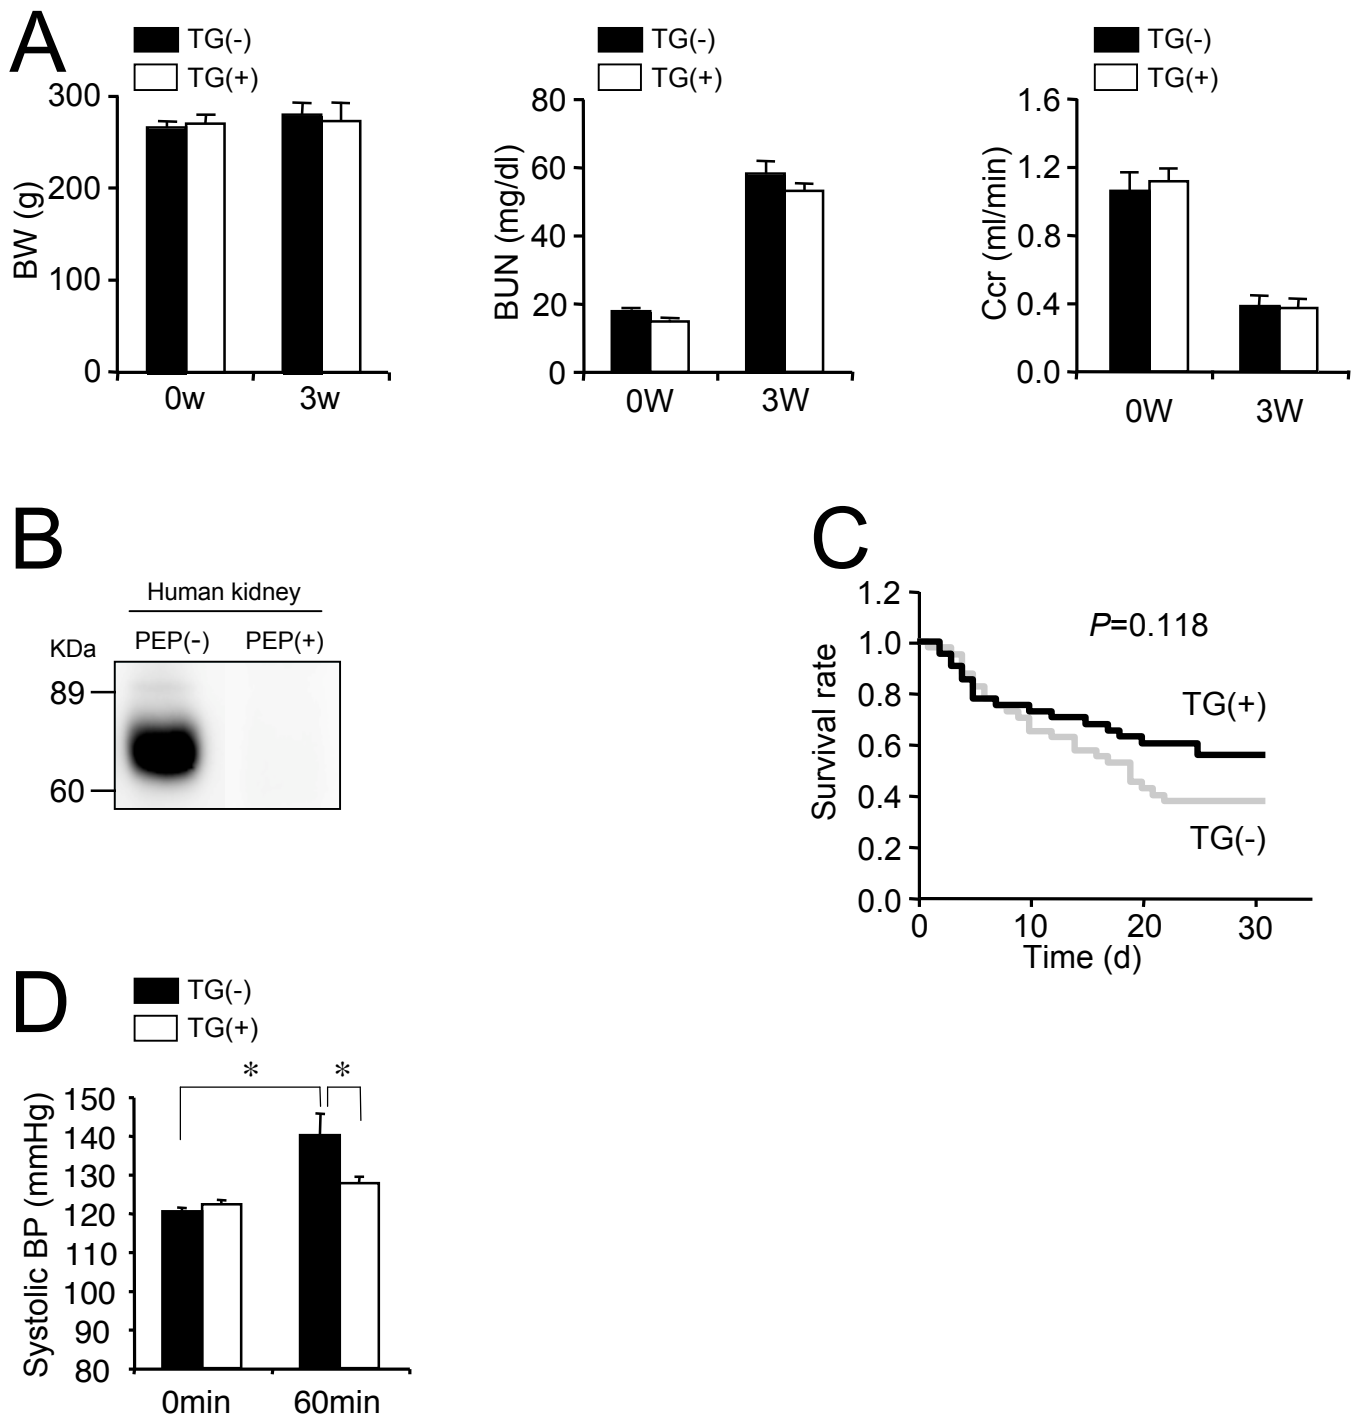

**Supplementary Figure 1** Characterization of TG rats. **(A)** Body weight and biochemical examinations of nephrectomized TG rats ( $n=16-20$  per group). **(B)** Western blotting with whole human kidney protein using antibody against human SLCO4C1. A single band was abolished by peptide absorption, suggesting the specificity of the antibody. **(C)** Survival rate of TG(-) rat ( $n=41$ ) and TG(+) rat ( $n=40$ ) after 5/6 nephrectomy. Kaplan-Meier curves and log-rank test were used to analyze the mortality rates.  $P=0.118$  by log-rank test.

**(D)** Blood pressure after intraperitoneal-injection of *trans*-aconitate (400mg/kg) to TG(-) rat and TG(+) rat ( $n=3$  per group).
