# Supplementary material
Source: PubMed Central journal article supplement (PMC2794232)
Supplement: ASN.2009070696_2.pdf [file ASN.2009070696_2.pdf]

anion

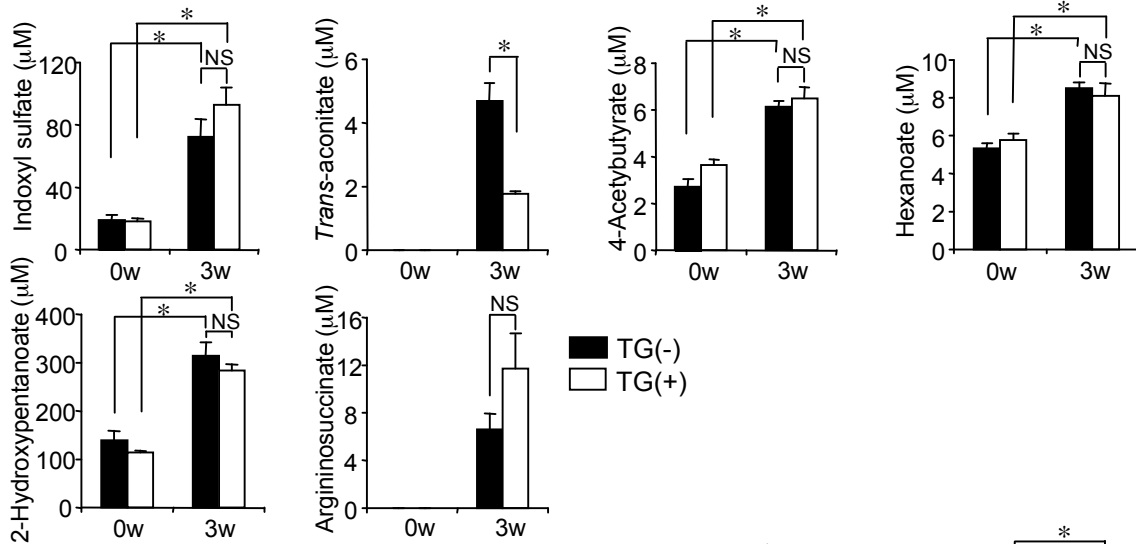

cation

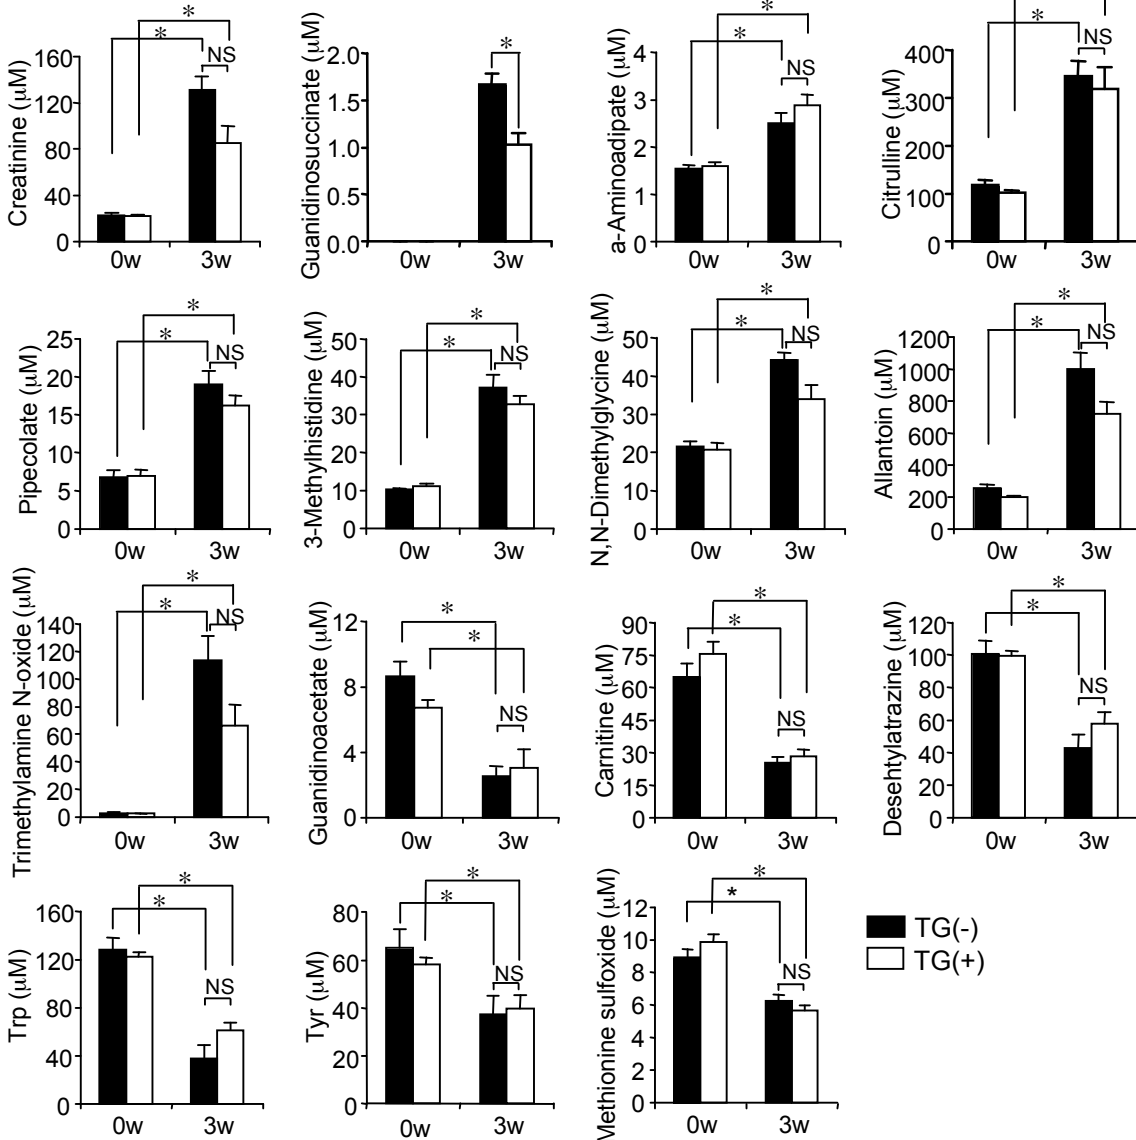

**Supplementary Figure 2** Metabolome analysis of uremic toxins measured by CE-MS. Anionic and cationic compounds that were significantly increased or decreased after nephrectomy were nominated (all analyzed data are in Supplementary Tables 1 - 4). Note that, among these, the plasma levels of GSA and *trans*-aconitate were significantly decreased in TG(+)*N*x rats 3 weeks after nephrectomy. Closed column; TG(-) rats, open column; TG(+) rats. \**P*<0.05. (*n*=4-5 per group).
