# Supplementary material
Source: PubMed Central journal article supplement (PMC2794232)
Supplement: ASN.2009070696_3.pdf [file ASN.2009070696_3.pdf]

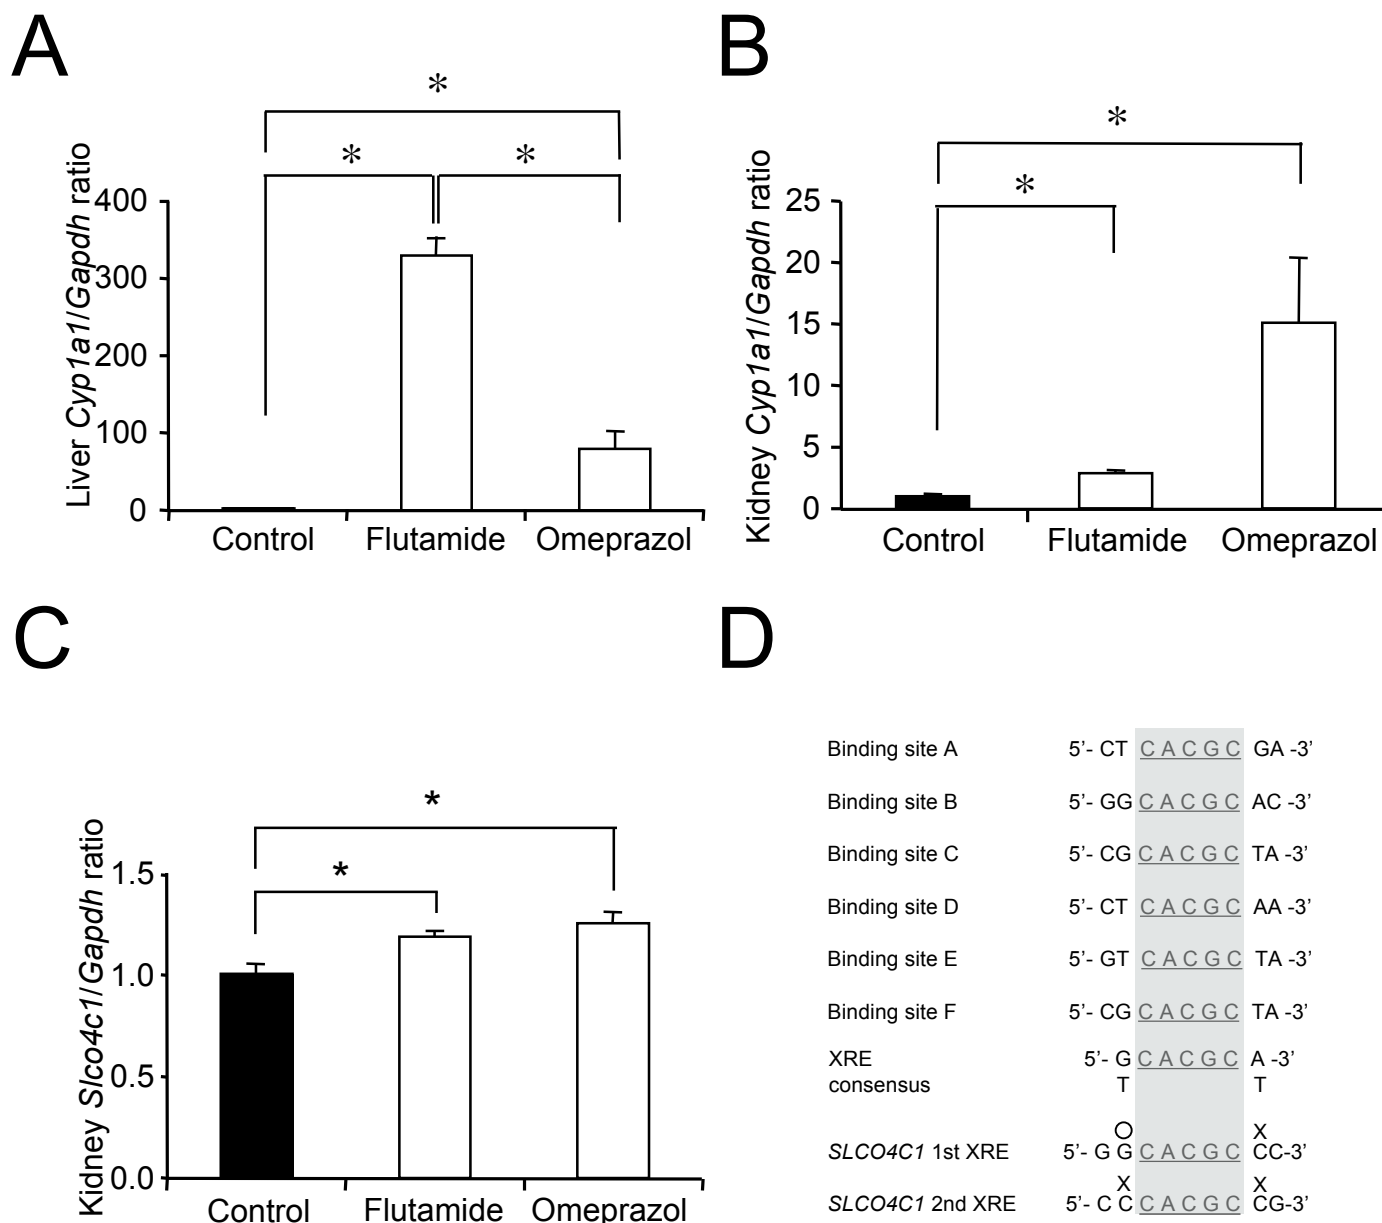

**Supplementary Figure 3** Different Induction of *cyp1a1* transcription by atypical AhR ligands. QT-PCR analysis of rat liver *cyp1a1* (A), kidney *cyp1a1* (B) and kidney *slco4c1* (C) after administration of flutamide (15.6 mg/kg/day) or omeprazole (125 mg/kg/day). Compounds were administered to Sprague-Dawley rats in corn oil by oral gavage once daily in the morning (Coe et al, 2006). Three days after administration, the mRNA level was measured by QT-PCR. \* $P < 0.05$  ( $n = 3$  per group). (D) Alignment of representative XRE motifs (Wu & Whitlock, 1993) and putative consensus sequence (Nioi & Hayes, 2004). Note that, although the XRE core sequence is conserved in human *SLCO4C1*, its surrounding 5'- and 3'-nucleotide sequences were not identical to the other XRE consensus motifs. O, consensus pattern; X, non-consensus pattern.

Coe KJ, Nelson SD, Ulrich RG, He Y, Dai X, Cheng O, Caguyong M, Roberts CJ, Slatter JG (2006) Profiling the hepatic effects of flutamide in rats: a microarray comparison with classical aryl hydrocarbon receptor ligands and atypical CYP1A inducers. *Drug Metab Dispos* **34**: 1266-1275

Nioi P, Hayes JD (2004) Contribution of NAD(P)H:quinone oxidoreductase 1 to protection against carcinogenesis, and regulation of its gene by the Nrf2 basic-region leucine zipper and the arylhydrocarbon receptor basic helix-loop-helix transcription factors. *Mutat Res* **555**: 149-171

Wu L, Whitlock JP, Jr. (1993) Mechanism of dioxin action: receptor-enhancer interactions in intact cells. *Nucleic Acids Res* **21**: 119-125
