# Supplementary material
Source: PubMed Central journal article supplement (PMC2794232)
Supplement: ASN.2009070696_5.pdf [file ASN.2009070696_5.pdf]

Plasma Cation (μM) Supplementary Table 2 Toyohara T. et al.

| Compound           | TSS1-1 3M |    |    |    |    | TSS1-1 5M |    |    |    |    | TSS1-1 10M |    |    |    |    | TSS1-1 30M |    |    |    |    | TSS1-1 50M |    |    |    |    | TSS1-1 100M |    |    |    |    | TSS1-1 200M |    |    |    |    | TSS1-1 300M |    |    |    |    | TSS1-1 400M |    |    |    |    | TSS1-1 500M |    |    |    |    |    |    |    |    |    |    |    |    |    |    |    |    |    |    |    |
|--------------------|-----------|----|----|----|----|-----------|----|----|----|----|------------|----|----|----|----|------------|----|----|----|----|------------|----|----|----|----|-------------|----|----|----|----|-------------|----|----|----|----|-------------|----|----|----|----|-------------|----|----|----|----|-------------|----|----|----|----|----|----|----|----|----|----|----|----|----|----|----|----|----|----|----|
|                    | 1         | 2  | 3  | 4  | 5  | 1         | 2  | 3  | 4  | 5  | 1          | 2  | 3  | 4  | 5  | 1          | 2  | 3  | 4  | 5  | 1          | 2  | 3  | 4  | 5  | 1           | 2  | 3  | 4  | 5  | 1           | 2  | 3  | 4  | 5  | 1           | 2  | 3  | 4  | 5  | 1           | 2  | 3  | 4  | 5  | 1           | 2  | 3  | 4  | 5  | 1  | 2  | 3  | 4  | 5  | 1  | 2  | 3  | 4  | 5  |    |    |    |    |    |
| Transaminase total | 27        | 27 | 27 | 27 | 27 | 27        | 27 | 27 | 27 | 27 | 27         | 27 | 27 | 27 | 27 | 27         | 27 | 27 | 27 | 27 | 27         | 27 | 27 | 27 | 27 | 27          | 27 | 27 | 27 | 27 | 27          | 27 | 27 | 27 | 27 | 27          | 27 | 27 | 27 | 27 | 27          | 27 | 27 | 27 | 27 | 27          | 27 | 27 | 27 | 27 | 27 | 27 | 27 | 27 | 27 | 27 | 27 | 27 | 27 | 27 | 27 | 27 | 27 | 27 | 27 |
