# Supplementary material
Source: PubMed Central journal article supplement (PMC2794232)
Supplement: ASN.2009070696_6.pdf [file ASN.2009070696_6.pdf]

Urine Anion (nmol/day) Supplementary Table 3

Toyohara T. et al.

Large table with columns for Compound, TSS1, SS1, TSS2, SS2, TSS3, SS3, TSS4, SS4, TSS5, SS5, TSS6, SS6, TSS7, SS7, TSS8, SS8, TSS9, SS9, TSS10, SS10, TSS11, SS11, TSS12, SS12, TSS13, SS13, TSS14, SS14, TSS15, SS15, TSS16, SS16, TSS17, SS17, TSS18, SS18, TSS19, SS19, TSS20, SS20, TSS21, SS21, TSS22, SS22, TSS23, SS23, TSS24, SS24, TSS25, SS25, TSS26, SS26, TSS27, SS27, TSS28, SS28, TSS29, SS29, TSS30, SS30, TSS31, SS31, TSS32, SS32, TSS33, SS33, TSS34, SS34, TSS35, SS35, TSS36, SS36, TSS37, SS37, TSS38, SS38, TSS39, SS39, TSS40, SS40, TSS41, SS41, TSS42, SS42, TSS43, SS43, TSS44, SS44, TSS45, SS45, TSS46, SS46, TSS47, SS47, TSS48, SS48, TSS49, SS49, TSS50, SS50, TSS51, SS51, TSS52, SS52, TSS53, SS53, TSS54, SS54, TSS55, SS55, TSS56, SS56, TSS57, SS57, TSS58, SS58, TSS59, SS59, TSS60, SS60, TSS61, SS61, TSS62, SS62, TSS63, SS63, TSS64, SS64, TSS65, SS65, TSS66, SS66, TSS67, SS67, TSS68, SS68, TSS69, SS69, TSS70, SS70, TSS71, SS71, TSS72, SS72, TSS73, SS73, TSS74, SS74, TSS75, SS75, TSS76, SS76, TSS77, SS77, TSS78, SS78, TSS79, SS79, TSS80, SS80, TSS81, SS81, TSS82, SS82, TSS83, SS83, TSS84, SS84, TSS85, SS85, TSS86, SS86, TSS87, SS87, TSS88, SS88, TSS89, SS89, TSS90, SS90, TSS91, SS91, TSS92, SS92, TSS93, SS93, TSS94, SS94, TSS95, SS95, TSS96, SS96, TSS97, SS97, TSS98, SS98, TSS99, SS99, TSS100, SS100.
